# Supplementary material
Source: MDPI journal article supplement (https://www.mdpi.com/2673-5636/2/2/21)
Supplement: s1 [file s1]

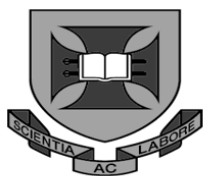

**THE UNIVERSITY  
OF QUEENSLAND**  
A U S T R A L I A

Survey endorsed by WAZA

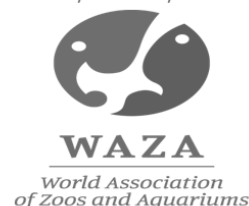

Survey - Interactive technology use with captive great apes

Participant Information Sheet

**PLEASE ONLY COMPLETE THIS SURVEY IF YOU  
CURRENTLY WORK WITH GREAT APES:  
Chimpanzees, gorillas, orangutans or bonobos.**

**Only ONE SURVEY PER SPECIES per facility may be submitted.**

**If you house more than one species of great apes e.g. chimpanzees and gorillas,  
ONE SURVEY FOR EACH SPECIES may be submitted.**

**Please ensure the PRIMARY CARETAKER for each species completes the survey.**

**Investigators:** Liz Bellward, PhD Candidate  
The University of Queensland, Australia  
E. [liz.bellward@uqconnect.edu.au](mailto:liz.bellward@uqconnect.edu.au)  
P. +61 (0) 404 222 991

**Professor Clive Phillips, Supervisor**  
The University of Queensland, Australia

**Goal of this Survey:**

The goal of this survey is to understand what interactive technology (where the ape engages directly with the technology) is being used globally, with what species of great apes and for what purpose.

**Survey Information:**

- The survey should take approximately 5 - 20 minutes to complete depending on your responses.
- Participation is voluntary, and all respondents may cease their participation at any time while completing the survey.
- All participants must be over the age of 18.

- Results may be used for publication and partial completion of a PhD thesis.
- All personal names (optional) and facility names provided within this survey will remain 100% confidential unless written permission is gained from the participant and / or the facility.
- All participants have access to results should they wish by contacting Liz Bellward at [liz.bellward@uqconnect.edu.au](mailto:liz.bellward@uqconnect.edu.au)

*This study adheres to the Guidelines of the ethical review process of The University of Queensland and the National Statement on Ethical Conduct in Human Research (Approval No. 2018000326). Whilst you are free to discuss your participation in this study with project staff (contactable on the details above), if you would like to speak to an officer of the University not involved in the study, you may contact the Human Ethics Office on +61 (0)7 3365 4584 or [humanethics@research.uq.edu.au](mailto:humanethics@research.uq.edu.au).*

\* 1. By completing this survey, you are consenting to participate in this research.

- ☐ I consent
- ☐ I do not consent

\* 2. Any personal contact information provided (optional within the survey), may be used to contact the participant via email for further information in regards to this survey, or to notify winners of the book draw.

Contact information will be stored on a password protected laptop and password protected cloud drive. If you wish to opt out at any time to have your contact details removed, please contact Liz Bellward at [liz.bellward@uqconnect.edu.au](mailto:liz.bellward@uqconnect.edu.au)

Please note, to participate in the survey you must provide your consent, even if you do not provide your contact details within the survey as they are optional.

- ☐ I consent
- ☐ I do not consent

**"I do not consent" will end the survey and skip all questions.**



THE UNIVERSITY  
OF QUEENSLAND  
AUSTRALIA

Survey endorsed by WAZA

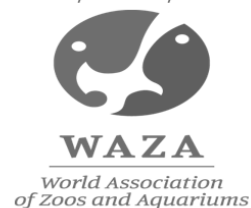

## Survey - Interactive technology use with captive great apes

### Qualifier

\* 3. What great ape species do you care for at your zoo? *Please select the ONE APE SPECIES that you primarily care for. If your zoo houses another species, please forward this survey to their primary keeper to complete. All questions from this point will refer to your selection of great ape species below.*

- ☐ Chimpanzees
- ☐ Orangutans
- ☐ Gorillas
- ☐ Bonobos
- ☐ None

**"None" will end the survey  
and skip all questions.**



**THE UNIVERSITY  
OF QUEENSLAND**  
A U S T R A L I A

Survey endorsed by WAZA



## Survey - Interactive technology use with captive great apes

### General Questions

\* 4. What is the name of your zoo or facility?

\* 5. What region are you located?

- ☐ Africa
- ☐ Asia
- ☐ Australia and NZ
- ☐ Europe
- ☐ Middle East
- ☐ North America and Canada
- ☐ South America
- ☐ United Kingdom
- ☐ Other (please specify)

\* 6. Choose the "best fit" to describe your role / position.

- ☐ Volunteer
- ☐ Keeper
- ☐ Senior Keeper
- ☐ Single-exhibit Manager of a species or similar species e.g. gorillas or primates
- ☐ Multi-exhibit Manager of different species e.g. Asia / Africa
- ☐ Curator / Facility Manager
- ☐ Other (please specify)

\* 7. What is your gender?

- ☐ Male
- ☐ Female
- ☐ Other
- ☐ Prefer not to say

\* 8. What is your age?

- ☐ Under 18
- ☐ 18-20
- ☐ 20-30
- ☐ 30-40
- ☐ 40-50
- ☐ 50-60
- ☐ Over 60
- ☐ Prefer not to say

\* 9. How long have you worked with captive, non-domestic animals?

- ☐ Under 1 year
- ☐ 1-2 years
- ☐ 3-5 years
- ☐ 6-10 years
- ☐ 11-15 years
- ☐ Greater than 15 years

\* 10. How long have you worked in your current position at this facility?

- ☐ Under 1 year
- ☐ 1-2 years
- ☐ 3-5 years
- ☐ 6-10 years
- ☐ 11-15 years
- ☐ Greater than 15 years

\* 11. Please list your completed qualifications (education only). *Please select as many qualifications as you hold.*

- ☐ Junior School
- ☐ High School
- ☐ Certificate
- ☐ Diploma
- ☐ Degree
- ☐ Postgraduate - Honours
- ☐ Postgraduate - Masters
- ☐ Postgraduate - PhD

Please specify the Specialisations / Majors for any study after high school.

\* 12. What size is your zoo / facility?

- ☐ Small - 1 to 20 paid employees (full time equivalent)
- ☐ Medium - 21 to 50 paid employees (full time equivalent)
- ☐ Large - 51 to 100 paid employees (full time equivalent)
- ☐ Very large - 100+ paid employees (full time equivalent)

\* 13. Please rank the importance of the following enrichment options to captive apes' MENTAL WELL-BEING? Please rank the following by clicking and dragging each row up or down.

1 (top) = most important

11 (bottom) = the least important.

|                                                                                     |                                 |                                                                                                    |                                         |
|-------------------------------------------------------------------------------------|---------------------------------|----------------------------------------------------------------------------------------------------|-----------------------------------------|
|    | <input type="text" value="1"/>  | Food Enrichment e.g. scatter feeds                                                                 | <input type="checkbox"/> Not beneficial |
|    | <input type="text" value="2"/>  | Spatial Enrichment e.g. changing surroundings                                                      | <input type="checkbox"/> Not beneficial |
|    | <input type="text" value="3"/>  | Olfactory Enrichment e.g. spraying scents in their enclosure                                       | <input type="checkbox"/> Not beneficial |
|    | <input type="text" value="4"/>  | Auditory Enrichment e.g. playing animal vocalisations                                              | <input type="checkbox"/> Not beneficial |
|    | <input type="text" value="5"/>  | Social Enrichment e.g. changing group structures                                                   | <input type="checkbox"/> Not beneficial |
|    | <input type="text" value="6"/>  | Interactive Technological Enrichment e.g. apes playing the piano on the iPad, painting on the iPad | <input type="checkbox"/> Not beneficial |
|  | <input type="text" value="7"/>  | Visual Enrichment e.g. TV, videos                                                                  | <input type="checkbox"/> Not beneficial |
|  | <input type="text" value="8"/>  | Cognitive Challenges e.g. puzzle feeders                                                           | <input type="checkbox"/> Not beneficial |
|  | <input type="text" value="9"/>  | Motor Skill Activities e.g. termite fishing mounds                                                 | <input type="checkbox"/> Not beneficial |
|  | <input type="text" value="10"/> | Ape-Keeper Interactions e.g. training sessions                                                     | <input type="checkbox"/> Not beneficial |
|  | <input type="text" value="11"/> | Ape-Public Interactions e.g. animal encounters                                                     | <input type="checkbox"/> Not beneficial |

\* 14. Please rank the importance of the following values to captive apes' MENTAL WELL-BEING?*Please rank the following by clicking and dragging each row up or down.*

1 (top)= most important

5 (bottom) = the least important.

|                                                                                   |                                   |                                         |                                            |
|-----------------------------------------------------------------------------------|-----------------------------------|-----------------------------------------|--------------------------------------------|
|  | <div><div></div><div></div></div> | Providing apes with some choice         | <input type="checkbox"/> Not<br>beneficial |
|  | <div><div></div><div></div></div> | Providing apes with some control        | <input type="checkbox"/> Not<br>beneficial |
|  | <div><div></div><div></div></div> | Providing apes with some predictability | <input type="checkbox"/> Not<br>beneficial |
|  | <div><div></div><div></div></div> | Providing apes with some variety        | <input type="checkbox"/> Not<br>beneficial |
|  | <div><div></div><div></div></div> | Good relationships with keepers         | <input type="checkbox"/> Not<br>beneficial |



\* 15. What effect do you see interactive technology could potentially have on the apes with the following? Interactive technology means technology the ape ACTIVELY ENGAGES with e.g. an iPad, computer etc. *Please rate for each row, the effect on the apes.*

|                                                                                              | Highly Positive<br>Effect | Positive Effect       | No Effect             | Negative Effect       | Highly Negative<br>Effect |
|----------------------------------------------------------------------------------------------|---------------------------|-----------------------|-----------------------|-----------------------|---------------------------|
| Enrichment e.g. apes playing the piano or painting on an iPad                                | <input type="radio"/>     | <input type="radio"/> | <input type="radio"/> | <input type="radio"/> | <input type="radio"/>     |
| Social e.g. apes selecting choice of mates, video conferencing apes or keepers at other zoos | <input type="radio"/>     | <input type="radio"/> | <input type="radio"/> | <input type="radio"/> | <input type="radio"/>     |
| Keeper / ape relationship                                                                    | <input type="radio"/>     | <input type="radio"/> | <input type="radio"/> | <input type="radio"/> | <input type="radio"/>     |
| Welfare - mental health                                                                      | <input type="radio"/>     | <input type="radio"/> | <input type="radio"/> | <input type="radio"/> | <input type="radio"/>     |
| Welfare - physical health e.g. apes can communicate to their keeper if in pain               | <input type="radio"/>     | <input type="radio"/> | <input type="radio"/> | <input type="radio"/> | <input type="radio"/>     |
| Reduction of abnormal behaviours e.g. games can keep the ape's mind active                   | <input type="radio"/>     | <input type="radio"/> | <input type="radio"/> | <input type="radio"/> | <input type="radio"/>     |
| Providing apes with some choice e.g apes can choose food or toys                             | <input type="radio"/>     | <input type="radio"/> | <input type="radio"/> | <input type="radio"/> | <input type="radio"/>     |
| Providing apes with some control e.g. apes can change the temperature of indoor enclosures   | <input type="radio"/>     | <input type="radio"/> | <input type="radio"/> | <input type="radio"/> | <input type="radio"/>     |

Any other effects you could think of? Please specify.

\* 16. What effect do you believe interactive technology could potentially have on the zoo and conservation with the following? *Please rate for each row, the effect on the zoo or conservation.*

|                                                                                      | Highly Positive<br>Effect | Positive Effect       | No Effect             | Negative Effect       | Highly Negative<br>Effect |
|--------------------------------------------------------------------------------------|---------------------------|-----------------------|-----------------------|-----------------------|---------------------------|
| Public engagement at the zoo resulting in promotion of the conservation message      | <input type="radio"/>     | <input type="radio"/> | <input type="radio"/> | <input type="radio"/> | <input type="radio"/>     |
| Public engagement at the zoo affecting revenue for the zoo                           | <input type="radio"/>     | <input type="radio"/> | <input type="radio"/> | <input type="radio"/> | <input type="radio"/>     |
| Public engagement and visitor times spent at the ape enclosure                       | <input type="radio"/>     | <input type="radio"/> | <input type="radio"/> | <input type="radio"/> | <input type="radio"/>     |
| Publicity / media for the zoo affecting revenue for the zoo                          | <input type="radio"/>     | <input type="radio"/> | <input type="radio"/> | <input type="radio"/> | <input type="radio"/>     |
| Publicity / media for the species resulting in promotion of the conservation message | <input type="radio"/>     | <input type="radio"/> | <input type="radio"/> | <input type="radio"/> | <input type="radio"/>     |

Any other effects you could think of? Please specify.

\* 17. Do you think it is good or bad to provide captive great apes with interactive technology? *Please provide one response only.*

- ☐ Very good
- ☐ Good
- ☐ Neutral - Neither good, nor bad
- ☐ Bad
- ☐ Very Bad
- ☐ No opinion, as don't know enough about it

\* 18. Would you like to see more use of interactive technology with great apes in your zoo? *Please provide one response only.*

- ☐ Yes, I would like to see more use of interactive technology with great apes
- ☐ I am happy with current level of use of interactive technology with great apes
- ☐ No, I would not like to see more use of interactive technology with great apes
- ☐ No opinion, do not know enough about it

\* 19. Please rate the current challenges you face in using interactive technology with your great apes? *Please rate all rows.*

|                                                      | No Challenge          | Minor Challenge       | Major Challenge       |
|------------------------------------------------------|-----------------------|-----------------------|-----------------------|
| Funding to buy technology                            | <input type="radio"/> | <input type="radio"/> | <input type="radio"/> |
| Time to use technology with apes                     | <input type="radio"/> | <input type="radio"/> | <input type="radio"/> |
| Human expertise - programming / using the technology | <input type="radio"/> | <input type="radio"/> | <input type="radio"/> |
| The apes breaking the technology                     | <input type="radio"/> | <input type="radio"/> | <input type="radio"/> |
| Zoo management support                               | <input type="radio"/> | <input type="radio"/> | <input type="radio"/> |
| Public perception                                    | <input type="radio"/> | <input type="radio"/> | <input type="radio"/> |
| Keeper perception                                    | <input type="radio"/> | <input type="radio"/> | <input type="radio"/> |

Any other challenges? Please specify.

\* 20. Please rate the the possible negative impacts you see with using interactive technology with great apes? *Please rate all rows.*

|                                                                   | Technology Would Have No Impact | Minor Negative        | Major Negative        |
|-------------------------------------------------------------------|---------------------------------|-----------------------|-----------------------|
| Decrease of exercise                                              | <input type="radio"/>           | <input type="radio"/> | <input type="radio"/> |
| Decrease in physical health                                       | <input type="radio"/>           | <input type="radio"/> | <input type="radio"/> |
| Decrease in mental health                                         | <input type="radio"/>           | <input type="radio"/> | <input type="radio"/> |
| Competition amongst apes / fighting for use of technology         | <input type="radio"/>           | <input type="radio"/> | <input type="radio"/> |
| Antisocial ape behaviour - spending too much time with technology | <input type="radio"/>           | <input type="radio"/> | <input type="radio"/> |
| Bad publicity for the zoo and / or loss of revenue                | <input type="radio"/>           | <input type="radio"/> | <input type="radio"/> |
| Addiction to technology                                           | <input type="radio"/>           | <input type="radio"/> | <input type="radio"/> |

Any other negatives? Please specify?

\* 21. Do your apes currently engage directly with interactive technology?

- ☐ Yes
 ☐ No
 **"No" will skip the "Interactive Technology" and "Touch Screen Technology" sections of the survey and take them to the "Communication Qualifier" page.**

22. Any general comments you would like to make on interactive technology use with captive great apes?



## Survey - Interactive technology use with captive great apes

### Interactive Technology

\* 23. What forms of interactive technology do your apes interact with? *Please select as many answers as you wish.*

- ☐ Portable Touchscreens - iPad / tablet / iPhone etc.
- ☐ Touchscreen Computers
- ☐ Touchscreen TVs
- ☐ Other "Touch" technology
- ☐ Computers - Joystick interface
- ☐ Computers - Keyboard interface
- ☐ Ape Operated Cameras or Videos
- ☐ Ape Controlled Temperature Gauges
- ☐ Ape Controlled Lights
- ☐ Ape Controlled Music
- ☐ Food Vending Machines
- ☐ Other? Please explain below.

If the participant selects the four highlighted "touch technology" options, they will proceed to the "Touch Screen Technology" sections.

If they do not select the highlighted options, they will skip to the "Communications Qualifier" page.

\* 24. What is the purpose of using the interactive technology with your apes?*Please select as many answers as you wish.*

- ☐ Enrichment
- ☐ Ape to Keeper Communication
- ☐ Ape to Public Communication
- ☐ Ape to Ape Communication
- ☐ Cognitive Research
- ☐ Language Research
- ☐ Husbandry Practices
- ☐ Medical Practices
- ☐ Public Entertainment
- ☐ Public Education
- ☐ Other? Please explain below.



## Survey - Interactive technology use with captive great apes

### Touch-screen Technology

\* 25. Touchscreen technology only - How do your apes interact with the technology? *Please provide one response only.*

- ☐ Technology is outside the enclosure but apes can access with fingers, toes, tools, keeper is present
- ☐ Technology is outside the enclosure but apes can access with fingers, toes, tools, keeper is not present
- ☐ Technology is temporary in the enclosure with the ape, keeper is present
- ☐ Technology is temporary in the enclosure with the ape, keeper is not present
- ☐ Technology is permanently in their enclosure, keeper is not present
- ☐ Other - please explain in comments

Any further comments?

\* 26. Touchscreen technology only - How regularly are the apes provided with access to the technology? Please provide an average. *Please provide one response only.*

- ☐ Permanently
- ☐ Daily
- ☐ Twice a week
- ☐ Once a week
- ☐ Once a fortnight
- ☐ Once a month
- ☐ Less often than once a month
- ☐ Other - please explain in comments

Any further comments?

\* 27. Touchscreen technology only - Do you insist that the apes use the technology in their allotted time? *Please provide one response only.*

- ☐ Yes, training session for the allocated time and they must stay the entire time
- ☐ No, the apes have total freedom to come and go as they wish, engage or not as they wish
- ☐ Other - please explain in comments

Any further comments?

\* 28. Touchscreen technology only - How long on average is each session that YOU OFFER the apes (not how long do they participate)? *Please provide one response only.*

- ☐ 5 minutes
- ☐ 10 minutes
- ☐ 15 minutes
- ☐ 30 minutes
- ☐ 1 hour
- ☐ As long as they are interested
- ☐ Other - please explain in comments

Any further comments?

\* 29. Touchscreen technology only - On average, how long do your apes actively engage with the technology per session? Please indicate the number of MINUTES you estimate. Please do not time your apes. *Please select only one time per age group.*

|                       | No engagement         | Under 1 minute        | 1-2 minutes           | 2-5 minutes           | 5-10 minutes          | 10-15 minutes         | 15-30 minutes         | 30-60 minutes         | Over 1 hour           | Have apes this age but they don't have access to technology | Do not have apes in this age group |
|-----------------------|-----------------------|-----------------------|-----------------------|-----------------------|-----------------------|-----------------------|-----------------------|-----------------------|-----------------------|-------------------------------------------------------------|------------------------------------|
| Infants under 2 years | <input type="radio"/>                                       | <input type="radio"/>              |
| Juveniles 2-5 years   | <input type="radio"/>                                       | <input type="radio"/>              |
| Juveniles 5-10 years  | <input type="radio"/>                                       | <input type="radio"/>              |
| Adults 10-30 years    | <input type="radio"/>                                       | <input type="radio"/>              |
| Adults 30+ years      | <input type="radio"/>                                       | <input type="radio"/>              |

Any further comments?



\* 30. Touchscreen technology only - Is there any difference in the level of engagement between sexes? *Please select as many answers as you wish.*

- ☐ Yes - females are more engaged
- ☐ Yes - males are more engaged
- ☐ No - depends more on ape's age
- ☐ No - depends on each individual ape
- ☐ Other - please explain below
- ☐ Any further comments?

\* 31. Touchscreen technology only - Do your apes interact with the technology individually or as a group? *Please provide one response only.*

- ☐ Individually
- ☐ 2 apes at a time
- ☐ 3 apes at a time
- ☐ Group as they choose
- ☐ Other - please explain below

Any further comments?

\* 32. Touchscreen technology only - What rewards / reinforcements do you use to encourage the apes to engage with the technology? *Please select as many answers as you wish.*

- ☐ Food
- ☐ Toys
- ☐ Verbal encouragement
- ☐ Tactile / physical encouragement e.g. pats, scratches
- ☐ Engaging with the technology is the reward
- ☐ None
- ☐ Other - please explain below

Any other rewards or encouragements? Any further comments?

\* 33. Touchscreen technology only - Please rate what engages your apes with using this technology? *Please rate all rows.*

|                                 | Highly engaging       | Engaging              | Does not encourage engagement |
|---------------------------------|-----------------------|-----------------------|-------------------------------|
| Reward                          | <input type="radio"/> | <input type="radio"/> | <input type="radio"/>         |
| Sound                           | <input type="radio"/> | <input type="radio"/> | <input type="radio"/>         |
| Colour                          | <input type="radio"/> | <input type="radio"/> | <input type="radio"/>         |
| Movement on the screen          | <input type="radio"/> | <input type="radio"/> | <input type="radio"/>         |
| Touching the technology         | <input type="radio"/> | <input type="radio"/> | <input type="radio"/>         |
| Videos                          | <input type="radio"/> | <input type="radio"/> | <input type="radio"/>         |
| Photos                          | <input type="radio"/> | <input type="radio"/> | <input type="radio"/>         |
| Games                           | <input type="radio"/> | <input type="radio"/> | <input type="radio"/>         |
| Problem solving activities      | <input type="radio"/> | <input type="radio"/> | <input type="radio"/>         |
| Interaction with keeper         | <input type="radio"/> | <input type="radio"/> | <input type="radio"/>         |
| Keeper encouragement            | <input type="radio"/> | <input type="radio"/> | <input type="radio"/>         |
| Other apes using the technology | <input type="radio"/> | <input type="radio"/> | <input type="radio"/>         |

Any other things that engage the apes? Any further comments?

\* 34. Touchscreen technology only - What apps / programs are you using with your apes? *Please select as many answers as you wish.*

- ☐ Music they listen to
- ☐ Music they play on e.g. drums
- ☐ Games
- ☐ Painting
- ☐ Visual e.g. Koy pond, scenery
- ☐ Video clips eg. YouTube
- ☐ Movies
- ☐ Audio Books
- ☐ Photos
- ☐ Communication with humans
- ☐ Communication with other apes e.g. Skype, Facetime
- ☐ Cognitive challenges
- ☐ Other - please explain below

Any other applications? Any further comments?



## Survey - Interactive technology use with captive great apes

### Communication Qualifier

\* 35. Do your **APES ACTIVELY COMMUNICATE** with keepers? If so, what methods are they using? Please note, this is active, deliberate communication, not a keeper reading their body language or vocalisations. *Please select as many answers as you wish.*

- ☐ No, they do not actively communicate with keepers American Sign Language,
- ☐ Auslan or similar Lexigrams / Symbols - technology
- ☐ Lexigrams / Symbols - cards
- ☐ Pictures - cards
- ☐ Pictures - technology
- ☐ Other technology - please explain below
- ☐ Basic gestural communication e.g. deliberate pointing Other - please explain below

Any other methods? Any other comments?

If the participant selects "No", they will skip the "Communication" section and go to the "Research" page (last page of survey).

If they select any of the communication options, they will proceed to the "Communication" section.



## Survey - Interactive technology use with captive great apes

### Communication

\* 36. In terms of **APE ACTIVE COMMUNICATION**, what are your apes communicating to keepers? *Please select as many answers as you wish.*

- ☐ Food choice for snacks / rewards
- ☐ Food choice for main meal
- ☐ Toy choice
- ☐ Enrichment choice
- ☐ Communicate health concerns e.g. headache, stomachache
- ☐ Communicate mental welfare e.g. feelings, emotions, moods
- ☐ Social e.g. choice of social groupings
- ☐ Environmental e.g. choice of enclosures
- ☐ Communicate physical sensations e.g. hot, cold, hungry
- ☐ Other - please explain below
- ☐ Any further communication? Any further comments?

37. Touchscreen technology only - What specific apps are you using with your apes for **ACTIVE COMMUNICATION** with humans?



## Survey - Interactive technology use with captive great apes

### Research and Contact Details

\* 38. Has / is your facility participating in any research (formal or informal) in regards to great apes and technology?

☐ Yes

☐ No

If yes, please provide a brief summary of the research (optional) and contact details of the researcher (if they are happy to be contacted).

\* 39. Assume there was an application that would allow great apes to COMMUNICATE with keepers. It would;

- Be quick and easy for them to learn to use (picture-based)
- Allow choice of food, toys, social groupings
- Allow them to tell you if they are sick
- Allow them to communicate immediately when transferred to a new facility
- Be touchscreen based e.g. iPad as many facilities already using them.

Would you use the proposed communication application if the constraints of time and funding were addressed adequately? *Please provide one response only.*

☐ Definitely

☐ Probably

☐ Possibly

☐ Probably not

☐ Definitely not

Why? Why not? (Optional)

\* 40. What do you think the main challenges of using a COMMUNICATION tool like this would be? *Please rate all rows.*

|                                                                                                          | No Challenge          | Minor Challenge       | Significant Challenge |
|----------------------------------------------------------------------------------------------------------|-----------------------|-----------------------|-----------------------|
| Cost to purchase iPads / tablets                                                                         | <input type="radio"/> | <input type="radio"/> | <input type="radio"/> |
| Time to train the apes how to use                                                                        | <input type="radio"/> | <input type="radio"/> | <input type="radio"/> |
| Time to use with the apes once communicating                                                             | <input type="radio"/> | <input type="radio"/> | <input type="radio"/> |
| Time to respond to the apes e.g. prepare food they want (instead of standard), get toys etc.             | <input type="radio"/> | <input type="radio"/> | <input type="radio"/> |
| Time to train the keepers how to use                                                                     | <input type="radio"/> | <input type="radio"/> | <input type="radio"/> |
| Time / skills to customise application to your facility                                                  | <input type="radio"/> | <input type="radio"/> | <input type="radio"/> |
| Apes breaking the iPad / tablet (zoos using them now use them through the wire mesh to prevent breakage) | <input type="radio"/> | <input type="radio"/> | <input type="radio"/> |
| Safety - zoo would consider you are too close to the apes                                                | <input type="radio"/> | <input type="radio"/> | <input type="radio"/> |
| Competition between apes to use the iPad                                                                 | <input type="radio"/> | <input type="radio"/> | <input type="radio"/> |
| Public perception                                                                                        | <input type="radio"/> | <input type="radio"/> | <input type="radio"/> |
| Keeper perception                                                                                        | <input type="radio"/> | <input type="radio"/> | <input type="radio"/> |

Any other challenges you can see?

41. If you are happy to be contacted to answer further questions if required, please provide your contact details below. *Please leave blank if you do not wish to be contacted.*

**Name**

**Facility Name**

**Position within Facility**

**Address**

**City/Town**

**State/Province**

**ZIP/Postal Code**

**Country**

**Email Address**

**Phone Number**





THE UNIVERSITY  
OF QUEENSLAND  
AUSTRALIA

Survey endorsed by WAZA



## Survey - Interactive technology use with captive great apes

### Thank You

42. If you would you like to enter a draw to win one of the following books as a thank you for completing this survey, please provide your email address.

- \* Zoo Animal Welfare - Terry L. Maple & Bonnie M. Perdue
- \* The Welfare of Performing Animals - David A.H. Wilson
- \* The Welfare of Marine Mammals - Andy Butterworth

*This email address will not be used for any other purpose.*

43. Thank you for your time and input into this study. It is much appreciated.

PLEASE forward the survey link to other great ape departments in your zoo. More than one survey per facility may be submitted for multiple species.

PLEASE forward the survey link to your peers at other zoos or facilities, and encourage them to complete to allow a full understanding of industry practices.

Contact details again, should you need them are:

Liz Bellward  
University of Queensland  
E. [liz.bellward@uqconnect.edu.au](mailto:liz.bellward@uqconnect.edu.au)  
P. +61 (0) 404 222 991

If you would like to add any further comments, please do so below.
